# Supplementary material
Source: publisher figshare collection journal article supplement (https://tandf.figshare.com/ndownloader/files/22573361)
Supplement: Supplementary file 1 [file 22573361]

**No change in Atlantic Yellow-nosed Albatross (*Thalassarche chlororhynchos*) egg size over 160 years**

Alexander L. Bond*, Gregory T.W. McClelland, Richard J. Cuthbert, Trevor Glass, Julian Repetto, Peter G. Ryan

**Supplemental Material**

Table S1 – The breadth and width of Atlantic Yellow-nosed Albatross eggs remained consistent over time. Values are means ± SD. Only studies that included year, mean, SD, and range of values were included.

| **Year** | **Length ± SD (mm)** | **Width ± SD (mm)** | **n** | **Source** |
| --- | --- | --- | --- | --- |
| 1856 | 92.5 | 60.0 | 1 | [Bourne and David (1981)](#_ENREF_15) |
| 1868 | 89.7 | 60.9 | 1 | Natural History Museum, Tring |
| 1873 | 96.5 ± 4.4 | 60.4 ± 1.7 | 4 | Natural History Museum, Tring, National Museums Scotland, Edinburgh |
| 1887 | 96.3 ± 3.8 | 61.9 ± 1.9 | 75 | [Verrill (1895)](#_ENREF_85) |
| 1903 | 99.3 | 58.4 | 1 | Natural History Museum, Tring |
| 1919 | 94.7 ± 4.3 | 63.1 ± 1.6 | 4 | Natural History Museum, Tring |
| 1921 | 96.2 ± 3.6 | 61.6 ± 2.8 | 7 | Natural History Museum, Tring |
| 1927 | 95.3 ± 2.5 | 61.6 ± 0.6 | 2 | Natural History Museum, Tring |
| 1929 | 95.5 | 61.2 | 1 | Natural History Museum, Tring |
| 1930 | 96.7 | 61.6 | 1 | Natural History Museum, Tring |
| 1931 | 100.3 | 61.0 | 1 | Natural History Museum, Tring |
| 1935 | 96.8 ± 1.7 | 62.1 ± 1.8 | 2 | Natural History Museum, Tring |
| 1936 | 91.2 | 62.1 | 1 | Natural History Museum, Tring |
| 1945 | 96.9 ± 3.2 | 62.8 ± 0.9 | 5 | [Roberts (1948)](#_ENREF_73) |
| 1948 | 88.0 | 65.1 | 1 | [Broekhuysen and Macnae (1949)](#_ENREF_17) |
| 1950 | 91.6 ± 5.0 | 62.3 ± 2.3 | 8 | Natural History Museum, Tring |
| 1951 | 97.8 ± 7.9 | 62.5 ± 2.0 | 7 | Natural History Museum, Tring |
| 1973 | 94.3 ± 4.4 | 62.4 ± 2.2 | 36 | [Richardson (1984)](#_ENREF_72), National Museums Scotland, Edinburgh |
| 1974 | 98.3 ± 3.5 | 63.1 ± 3.3 | 7 | National Museums Scotland, Edinburgh |
| 2000 | 91.5 ± 6.3 | 60.3 ± 4.8 | 6 | This study |
| 2005 | 96.3 ± 4.0 | 62.4 ± 2.0 | 11 | This study |
| 2008 | 95.2 ± 4.5 | 62.4 ± 1.8 | 32 | This study |
| 2014 | 95.1 ± 3.7 | 61.7 ± 1.8 | 61 | This study |
| 2015 | 96.0 ± 4.0 | 62.4 ± 1.9 | 20 | This study |
